# Supplementary material for: Compositional and Functional Differences in the Human Gut Microbiome Correlate with Clinical Outcome following Infection with Wild-Type Salmonella enterica Serovar Typhi
Source: PubMed Central journal article supplement (PMC5941076; doi:10.1128/mbio.00686-18), 2018-05-08
Supplement: mbo002183863sf1.pdf [file mbo002183863sf1.pdf]

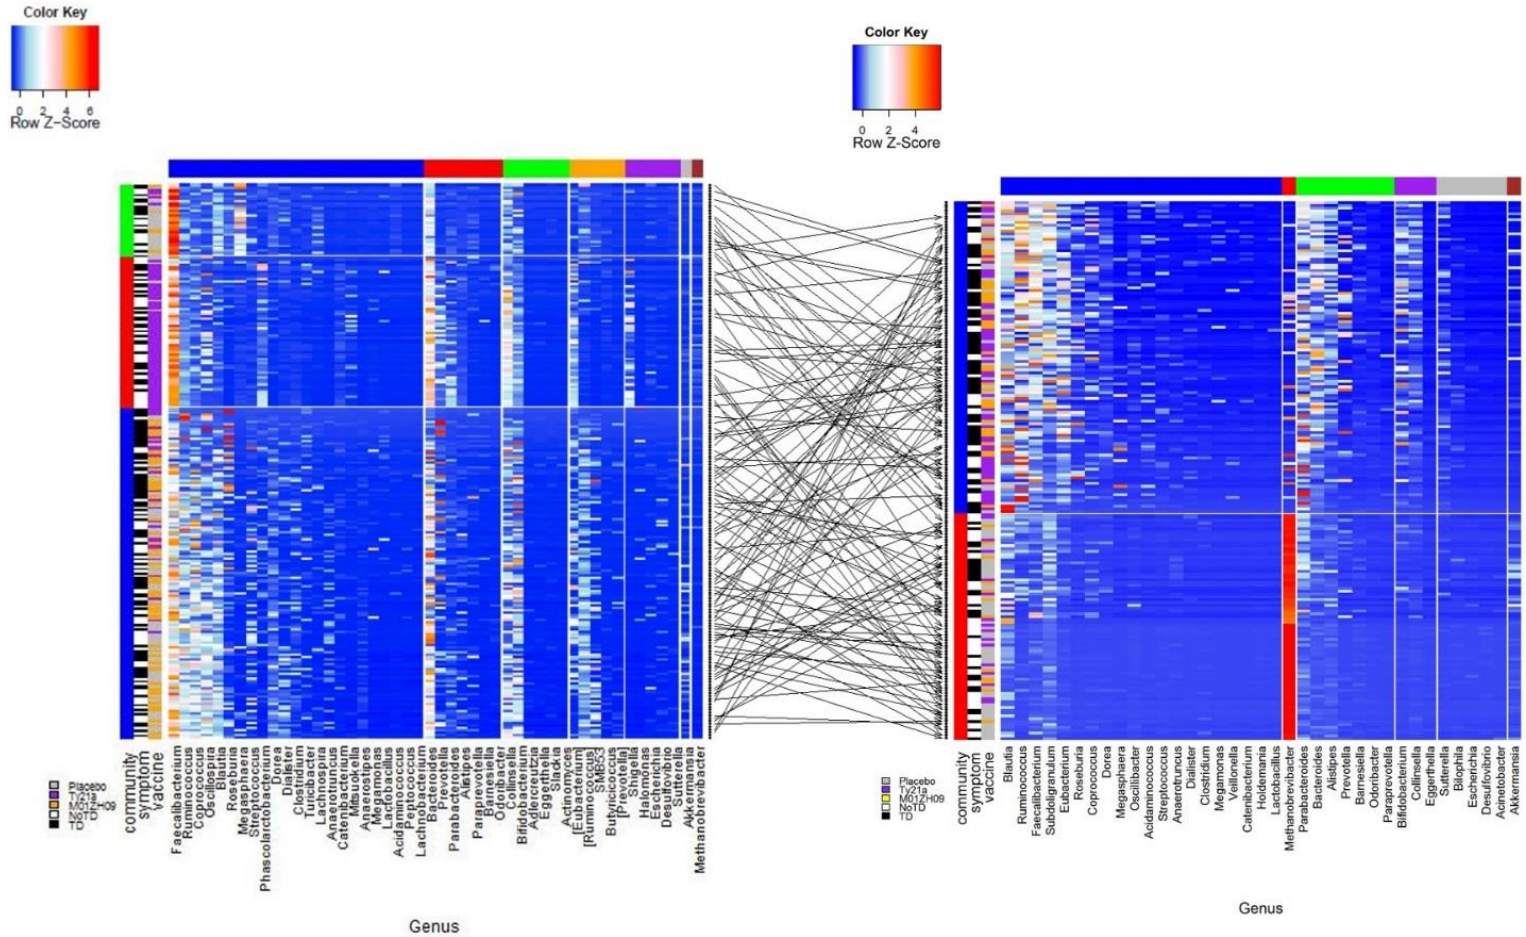

**Supplemental Figure S1.** Taxonomic abundance of the human gut microbiome estimated by 16S rRNA and metatranscriptome sequencing.

The two heat maps represent the same data presented in Figures 1 and 2. In the middle panel lines have been drawn to connect the same samples between the two heat maps.
