# Supplementary material for: Compositional and Functional Differences in the Human Gut Microbiome Correlate with Clinical Outcome following Infection with Wild-Type Salmonella enterica Serovar Typhi
Source: PubMed Central journal article supplement (PMC5941076; doi:10.1128/mbio.00686-18), 2018-05-08
Supplement: mbo002183863sf2.pdf [file mbo002183863sf2.pdf]

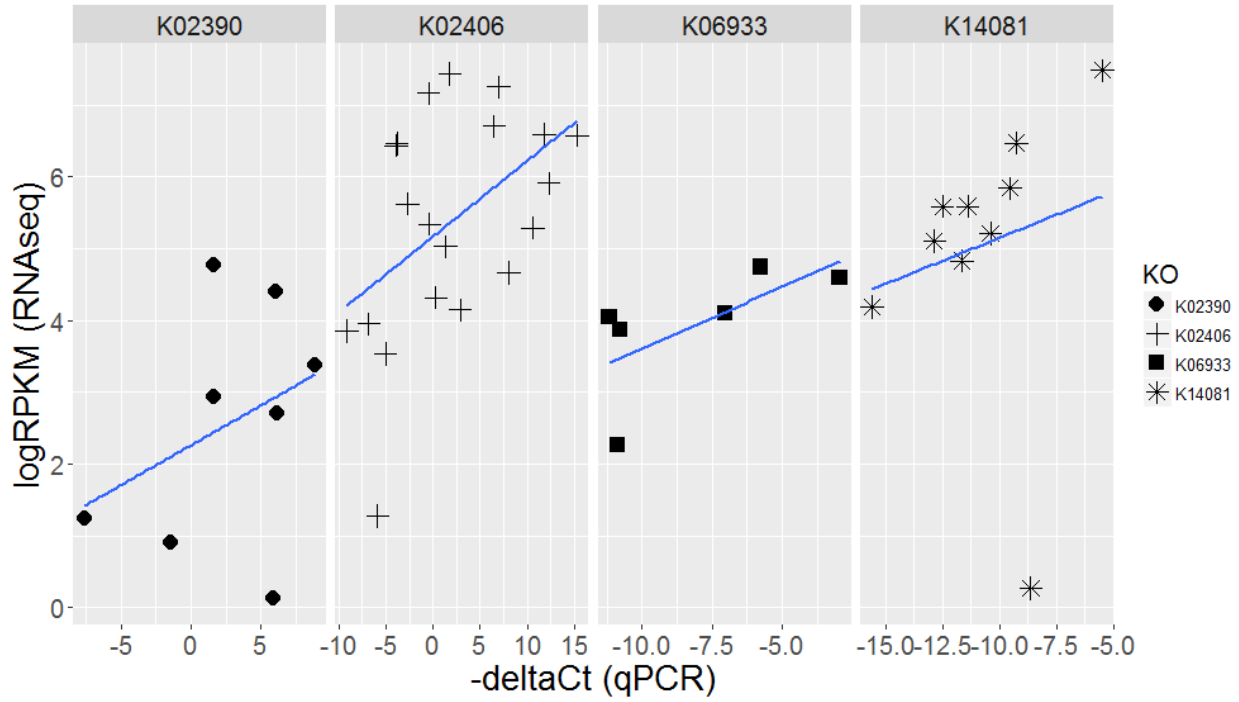

**Supplemental Figure S2.** Quantitative reverse transcription PCR (qPCR) analysis of select genes for baseline RNA samples from this study. The values represent the logRPKM values from the RNA-Seq result compared to  $-\Delta Ct$  values from the qPCR result. Regression lines in blue are presented for each KO. Positive correlations between RNAseq and qPCR were detected for all the tested KOs.
