# Supplementary material for: Compositional and Functional Differences in the Human Gut Microbiome Correlate with Clinical Outcome following Infection with Wild-Type Salmonella enterica Serovar Typhi
Source: PubMed Central journal article supplement (PMC5941076; doi:10.1128/mbio.00686-18), 2018-05-08
Supplement: mbo002183863st1.pdf [file mbo002183863st1.pdf]

**Supplemental Table S1.** Bray-Curtis dissimilarity for each subject over time. Abbreviations: BL, baseline; Vacc, vaccination; PostVacc, post-vaccination; PreChall, pre-challenge; Post1D, 1-day post-challenge; Post7D, 7-day post-challenge.

| Subject | outcome | vaccine | community         | BL1-BL2  | BL2-Vacc | Vacc-PostVacc | PostVacc-PreChall | PreChall-Post1D | Post1D-Post7D |
|---------|---------|---------|-------------------|----------|----------|---------------|-------------------|-----------------|---------------|
| 568     | NTD     | Ty21a   | Methano-dominated | 0.100352 | 0.050331 | 0.09253405    | 0.06313452        | 0.07279914      | NA            |
| 149     | TD      | Placebo | Methano-dominated | 0.279608 | 0.295528 | 0.2731186     | 0.1733439         | 0.1332571       | NA            |
| 250     | TD      | Ty21a   | Diverse           | 0.298227 | 0.464459 | 0.3506802     | 0.3591618         | 0.5350303       | 0.2595225     |
| 552     | TD      | M01ZH09 | Methano-dominated | 0.156331 | 0.26152  | 0.6314366     | 0.7303599         | 0.6665661       | 0.2428583     |
| 586     | NTD     | M01ZH09 | Diverse           | 0.296911 | 0.388285 | 0.3838152     | 0.2528591         | 0.3444417       | 0.2656658     |
| 777     | TD      | M01ZH09 | Diverse           | 0.590884 | 0.711775 | 0.5148846     | 0.3413374         | 0.5810092       | 0.5453609     |
| 616     | TD      | Placebo | Methano-dominated | 0.399438 | 0.675823 | 0.8324804     | 0.3314456         | 0.5097165       | NA            |
| 926     | NTD     | Placebo | Methano-dominated | 0.322587 | 0.837017 | 0.668666      | NA                | NA              | NA            |
| 783     | TD      | Placebo | Methano-dominated | 0.317479 | 0.537594 | 0.5312001     | 0.6655572         | NA              | NA            |
| 2       | TD      | Ty21a   | Diverse           | 0.222468 | 0.202786 | 0.1761187     | 0.2686047         | 0.117927        | 0.3026768     |
| 703     | TD      | Ty21a   | Diverse           | 0.201919 | 0.341993 | 0.2271009     | 0.2930581         | 0.1996614       | NA            |
| 745     | NTD     | M01ZH09 | Methano-dominated | 0.504939 | 0.370014 | 0.42202045    | 0.22889498        | 0.04074566      | 0.17565265    |
| 373     | TD      | Placebo | Diverse           | NA       | NA       | 0.4673189     | 0.5269238         | NA              | NA            |
| 857     | NTD     | Ty21a   | Diverse           | 0.407542 | 0.312598 | 0.2636531     | 0.1995709         | 0.4120577       | 0.5818702     |
| 644     | TD      | Ty21a   | Diverse           | 0.237509 | NA       | NA            | 0.2727735         | 0.1664675       | NA            |
| 859     | NTD     | Placebo | Diverse           | NA       | NA       | NA            | NA                | 0.3321297       | 0.4595007     |
| 467     | TD      | M01ZH09 | Diverse           | 0.487953 | 0.512243 | 0.8133012     | 0.5449538         | 0.4202522       | 0.2888658     |
| 403     | NTD     | Ty21a   | Diverse           | 0.513311 | 0.417696 | 0.3479852     | 0.5573594         | 0.5563995       | 0.5488997     |
| 968     | TD      | Ty21a   | Diverse           | 0.261966 | 0.407359 | 0.2194428     | 0.1522348         | 0.1951248       | 0.2653347     |
| 87      | TD      | Placebo | Diverse           | 0.454472 | 0.620075 | 0.727897      | 0.6692778         | 0.1275654       | 0.1354279     |
| 317     | TD      | M01ZH09 | Diverse           | 0.48361  | 0.519546 | 0.4738748     | NA                | NA              | 0.3477299     |
| 330     | NTD     | Placebo | Diverse           | 0.269879 | 0.239558 | 0.3225024     | 0.3970274         | NA              | NA            |
| 672     | NTD     | Placebo | Methano-dominated | 0.303945 | 0.16703  | 0.05572576    | 0.24312717        | 0.15739419      | 0.41581142    |
| 882     | TD      | M01ZH09 | Diverse           | 0.318344 | 0.300868 | 0.2115798     | 0.2583248         | 0.2412918       | NA            |
| 765     | NTD     | Ty21a   | Diverse           | 0.148388 | 0.436634 | 0.3335784     | 0.5618702         | 0.1388239       | NA            |
| 642     | NTD     | Ty21a   | Methano-dominated | 0.082587 | 0.366503 | 0.40611002    | 0.18018878        | 0.205705        | 0.12230673    |
| 781     | NTD     | Placebo | Methano-dominated | 0.049947 | 0.128086 | 0.1699083     | 0.08815929        | 0.07999262      | NA            |
