# Supplementary material for: Compositional and Functional Differences in the Human Gut Microbiome Correlate with Clinical Outcome following Infection with Wild-Type Salmonella enterica Serovar Typhi
Source: PubMed Central journal article supplement (PMC5941076; doi:10.1128/mbio.00686-18), 2018-05-08
Supplement: mbo002183863st2.pdf [file mbo002183863st2.pdf]

**Supplemental Table S2.** Primers used in this study

| Gene        | Predicted Protein Function   | Taxa                              | Primer ID                                 | Sequence 5'-3'         | Source     |
|-------------|------------------------------|-----------------------------------|-------------------------------------------|------------------------|------------|
| K02390      | flagellar hook protein FlgE  | <i>Roseburia</i>                  | Roseburia_UniRef50_G2T3E1_F               | TGGTAACAATATCGCCAACG   | This study |
| K02406      | flagellin                    | <i>Roseburia intestinalis</i>     | Roseburia_UniRef50_G2T3E1_R               | ACCGGTCGTAACACCAAGAC   | This study |
|             |                              |                                   | Roseburia_intestinalis_D4L1N7_F           | GCATCGATGGAACGGCTTTC   | This study |
|             |                              | Roseburia_intestinalis_D4L1N7_R   | TTCACTCAGCGCACCATCT                       | This study             |            |
|             |                              | <i>Roseburia intestinalis</i>     | Roseburia_intestinalis_P21991andQ39_YI9_F | GCGCACAGGCAAAATCTTCA   | This study |
|             |                              |                                   | Roseburia_intestinalis_P21991andQ39_YI9_R | AATCCACGGATCTGGCTTCT   | This study |
|             |                              | <i>Roseburia hominis</i>          | Roseburia_hominis_G2T5W2_F                | ATTGGATGACGTGGCGAACT   | This study |
|             |                              |                                   | Roseburia_hominis_G2T5W2_R                | CCGGCAGAATCTGTCTTGGT   | This study |
| K06933      | uncharacterized protein      | <i>Methanobrevibacter smithii</i> | M_smithi_A5UJN4_F                         | TGCGAAGACTGTGGTTTTCA   | This study |
|             |                              |                                   | M_smithi_A5UJN4_R                         | CAGCTGCAGGTGTCATCTGA   | This study |
| K14081      | methanol corrinoid protein   | <i>Methanobrevibacter smithii</i> | M_smithi_UniRef50_Q2NHM9_F                | TGTGGTGGAGGAGCTGTAAG   | This study |
|             |                              |                                   | M_smithi_UniRef50_Q2NHM9_R                | CGGTACGAATCCCCTACAA    | This study |
| <i>rpoB</i> | RNA polymerase, beta subunit | <i>Roseburia hominis</i>          | Rhominis_rpoB_F                           | CCGGTGTGTTGAGAGCTCT    | This study |
|             |                              |                                   | Rhominis_rpoB_R                           | AACACGATCGGCTTCTGGTT   | This study |
| <i>rpoB</i> | RNA polymerase, beta subunit | <i>Roseburia intestinalis</i>     | Rintestinalis_rpoB_F                      | TGTTCTGGTGTCCGGTGATG   | This study |
|             |                              |                                   | Rintestinalis_rpoB_R                      | TCTCACCGAAAATCGCACGA   | This study |
| <i>rpoB</i> | RNA polymerase, beta subunit | <i>Methanobrevibacter smithii</i> | Ms_rpoB_F                                 | AAGGGATTTGCACCCAACAC   | (1)        |
|             |                              |                                   | Ms_rpoB_R                                 | GACCACAGTTAGGACCCTCTGG | (1)        |

Reference

1. Dridi B, Henry M, El Khechine A, Raoult D, Drancourt M. 2009. High prevalence of *Methanobrevibacter smithii* and *Methanosphaera stadtmanae* detected in the human gut using an improved DNA detection protocol. *PLoS one* 4:e7063.
